# Supplementary material
Source: HighWire-hosted journal article supplement (https://drc.bmj.com/content/suppl/2021/06/11/9.1.e001950)

**Supplementary Table 1.** ICD-9 Codes of the comorbidities.

| Comorbidities                                 | ICD Code                                                                                    |
|-----------------------------------------------|---------------------------------------------------------------------------------------------|
| Ophthalmological Diabetic Complications       | 250.5                                                                                       |
| Renal Diabetic Complications                  | 250.4                                                                                       |
| Peripheral Vascular Disease                   | 250.7                                                                                       |
| Ischemic Stroke and Transient Ischemic Attack | 433.01, 433.11, 433.21, 433.31, 433.81, 433.91, 434.01, 434.91, 436, 435                    |
| Intracranial Hemorrhage                       | 430.00, 431.00, 432.00, 432.10, 432.90, 852.00-852.09, 852.20-852.29, 852.40-852.49, 853.00 |
| Atrial Fibrillation                           | 427.31, 429.4                                                                               |
| Heart Failure                                 | 428.00-428.99                                                                               |
| Ischemic Heart Disease                        | 410.00-411.99, 413.00-414.99                                                                |
| All-Cause Sudden Cardiac Death                | 410.00-410.99, 427.01, 427.4, 427.5                                                         |
| Osteoporosis                                  | 733.00                                                                                      |
| Dementia                                      | 290.00-290.99, 331.00, 294.10-294.29, 331.19                                                |
| Chronic Obstructive Pulmonary Disease         | 490.00-496.99                                                                               |
| Hypertension                                  | 491.00-492.99                                                                               |
| Cancer                                        | 140.00-209.99                                                                               |

**Supplementary Table 2.** Formulae for the measures of variability.

| Score                                              | Definition                                                                                                                                  |
|----------------------------------------------------|---------------------------------------------------------------------------------------------------------------------------------------------|
| Non-Normalized Score                               |                                                                                                                                             |
| Standard deviation                                 |                                                                                                                                             |
| Absolute successive variability score              | $\frac{100 * \text{number of measurements} > 0.5}{\text{number of measurements}}$                                                           |
| Percentage successive variability score            | $\frac{100 * \text{number of measurements} > 10\% \text{ of previous measurement}}{\text{number of measurements}}$                          |
| Normalized Score                                   |                                                                                                                                             |
| Normalized absolute successive variability score   | $\frac{100 * \text{number of measurements} > 0.5}{\text{number of measurements} * \text{individual mean}}$                                  |
| Normalized percentage successive variability score | $\frac{100 * \text{number of measurements} > 10\% \text{ of previous measurement}}{\text{number of measurements} * \text{individual mean}}$ |
| Coefficient of Variation                           | $\frac{SD}{\text{individual mean}}$                                                                                                         |
| SD/Initial                                         | $\frac{SD}{\text{individual initial value}}$                                                                                                |
| Variability Independent of Mean                    | $\frac{SD}{\text{individual mean} \frac{\ln(\text{population SD})}{\ln(\text{population mean})}}$                                           |

**Supplementary Table 3.** Quartile cut-offs and predictive value comparison in fasting blood glucose (FBG) variability measures.

| Quartile                                           | Hazard Ratio | 95% Confidence Interval | P-Value  | AUC   |
|----------------------------------------------------|--------------|-------------------------|----------|-------|
| Absolute Successive Variability Score              |              |                         |          |       |
| Q2                                                 | 1.11         | [1.08, 1.15]            | < 0.0001 | 0.515 |
| Q3                                                 | 1.24         | [1.21, 1.28]            | < 0.0001 | 0.531 |
| Q4                                                 | 1.49         | [1.45, 1.53]            | < 0.0001 | 0.558 |
| Percentage Successive Variability Score            |              |                         |          |       |
| Q2                                                 | 1.17         | [1.13, 1.21]            | < 0.0001 | 0.520 |
| Q3                                                 | 1.29         | [1.25, 1.33]            | < 0.0001 | 0.534 |
| Q4                                                 | 1.67         | [1.63, 1.72]            | < 0.0001 | 0.574 |
| Standard Deviation                                 |              |                         |          |       |
| Q2                                                 | 1.14         | [1.10, 1.17]            | < 0.0001 | 0.517 |
| Q3                                                 | 1.33         | [1.29, 1.37]            | < 0.0001 | 0.539 |
| Q4                                                 | 1.78         | [1.73, 1.83]            | < 0.0001 | 0.583 |
| Normalized Absolute Successive Variability Score   |              |                         |          |       |
| Q2                                                 | 1.05         | [1.01, 1.08]            | 0.011    | 0.506 |
| Q3                                                 | 1.13         | [1.10, 1.17]            | < 0.0001 | 0.518 |
| Q4                                                 | 1.44         | [1.40, 1.47]            | < 0.0001 | 0.553 |
| Normalized Percentage Successive Variability Score |              |                         |          |       |
| Q2                                                 | 1.08         | [1.04, 1.11]            | < 0.0001 | 0.509 |
| Q3                                                 | 1.25         | [1.21, 1.29]            | < 0.0001 | 0.530 |
| Q4                                                 | 1.57         | [1.53, 1.61]            | < 0.0001 | 0.565 |
| Standard Deviation/ Initial FBG                    |              |                         |          |       |
| Q2                                                 | 1.13         | [1.09, 1.17]            | < 0.0001 | 0.515 |
| Q3                                                 | 1.36         | [1.31, 1.40]            | < 0.0001 | 0.540 |
| Q4                                                 | 1.90         | [1.86, 1.97]            | < 0.0001 | 0.593 |
| Coefficient of Variation                           |              |                         |          |       |
| Q2                                                 | 1.12         | [1.09, 1.16]            | < 0.0001 | 0.514 |
| Q3                                                 | 1.35         | [1.31, 1.40]            | < 0.0001 | 0.540 |
| Q4                                                 | 1.96         | [1.91, 2.01]            | < 0.0001 | 0.596 |
| Variability Independent of Mean                    |              |                         |          |       |
| Q2                                                 | 1.12         | [1.08, 1.16]            | < 0.0001 | 0.514 |
| Q3                                                 | 1.35         | [1.31, 1.41]            | < 0.0001 | 0.540 |
| Q4                                                 | 1.92         | [1.87, 1.98]            | < 0.0001 | 0.594 |

**Supplementary Table 4.** Quartile cut-offs and predictive value comparison in HbA1c variability

|                                                    | Hazard Ratio | 95% Confidence Interval | P-Value  | AUC   |
|----------------------------------------------------|--------------|-------------------------|----------|-------|
| measu<br>res.                                      |              |                         |          |       |
| Absolute Successive Variability Score              |              |                         |          |       |
| Q2                                                 | 1.17         | [1.13, 1.20]            | < 0.0001 | 0.521 |
| Q3                                                 | 1.23         | [1.19, 1.27]            | < 0.0001 | 0.529 |
| Q4                                                 | 1.46         | [1.42, 1.50]            | < 0.0001 | 0.555 |
| Percentage Successive Variability Score            |              |                         |          |       |
| Q2                                                 | 1.17         | [1.14, 1.21]            | < 0.0001 | 0.522 |
| Q3                                                 | 1.31         | [1.27, 1.35]            | < 0.0001 | 0.538 |
| Q4                                                 | 1.50         | [1.46, 1.54]            | < 0.0001 | 0.558 |
| Standard Deviation                                 |              |                         |          |       |
| Q2                                                 | 1.07         | [1.04, 1.10]            | < 0.0001 | 0.509 |
| Q3                                                 | 1.20         | [1.16, 1.23]            | < 0.0001 | 0.525 |
| Q4                                                 | 1.58         | [1.54, 1.62]            | < 0.0001 | 0.568 |
| Normalized Absolute Successive Variability Score   |              |                         |          |       |
| Q2                                                 | 1.16         | [1.13, 1.20]            | < 0.0001 | 0.520 |
| Q3                                                 | 1.25         | [1.21, 1.28]            | < 0.0001 | 0.531 |
| Q4                                                 | 1.45         | [1.41, 1.49]            | < 0.0001 | 0.554 |
| Normalized Percentage Successive Variability Score |              |                         |          |       |
| Q2                                                 | 1.20         | [1.16, 1.23]            | < 0.0001 | 0.525 |
| Q3                                                 | 1.29         | [1.26, 1.33]            | < 0.0001 | 0.536 |
| Q4                                                 | 1.51         | [1.47, 1.55]            | < 0.0001 | 0.559 |
| Standard Deviation/ Initial HbA1c                  |              |                         |          |       |
| Q2                                                 | 1.08         | [1.05, 1.11]            | < 0.0001 | 0.510 |
| Q3                                                 | 1.24         | [1.20, 1.28]            | < 0.0001 | 0.529 |
| Q4                                                 | 1.62         | [1.57, 1.66]            | < 0.0001 | 0.570 |
| Coefficient of Variation                           |              |                         |          |       |
| Q2                                                 | 1.06         | [1.03, 1.09]            | < 0.001  | 0.507 |
| Q3                                                 | 1.26         | [1.22, 1.30]            | < 0.0001 | 0.532 |
| Q4                                                 | 1.63         | [1.59, 1.68]            | < 0.0001 | 0.572 |
| Variability Independent of Mean                    |              |                         |          |       |
| Q2                                                 | 1.07         | [1.03, 1.10]            | < 0.0001 | 0.508 |
| Q3                                                 | 1.25         | [1.21, 1.28]            | < 0.0001 | 0.530 |
| Q4                                                 | 1.63         | [1.59, 1.67]            | < 0.0001 | 0.572 |

**Supplementary Table 5.** Variable importance ranking generated by RSF model

| <b>Characteristics</b>                      | <b>Importance</b> |
|---------------------------------------------|-------------------|
| Neutrophil-lymphocyte ratio                 | 0.1373            |
| Age                                         | 0.0215            |
| Anemia                                      | 0.0167            |
| Standard deviation of fasting blood glucose | 0.0112            |
| Heart failure                               | 0.0061            |
| Standard deviation of HbA1c                 | 0.0054            |
| Mean fasting blood glucose                  | 0.0038            |
| Hypertension                                | 0.0030            |
| High density lipoprotein-cholesterol        | 0.0022            |

**Supplementary Figure 1A.** Graphical representation of quartile hazard ratios from fasting blood glucose variability measures.

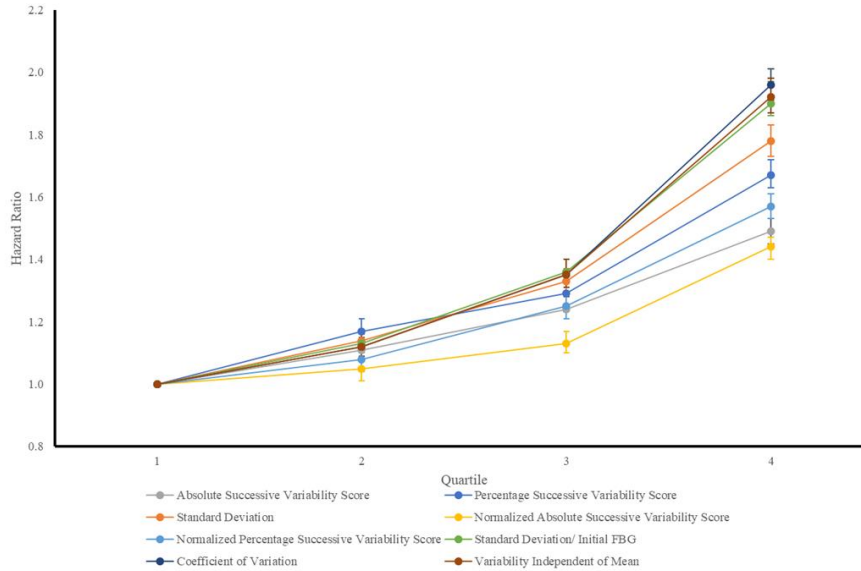

**Supplementary Figure 1B.** Graphical representation of quartile hazard ratios from HbA1c variability measures.

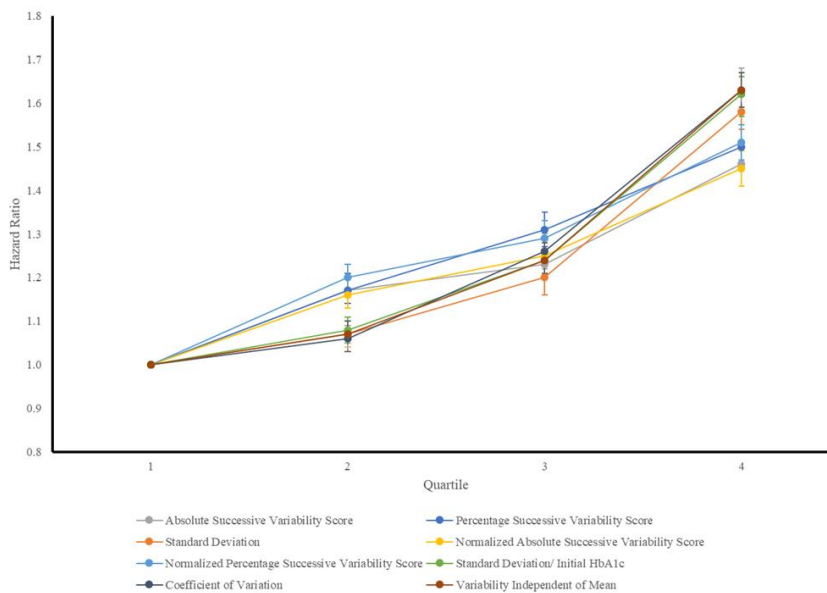

**Supplementary Figure 2.** Receiver operating characteristic curve and area under the curve (AUC) of the score-based predictive risk model for all-cause mortality.

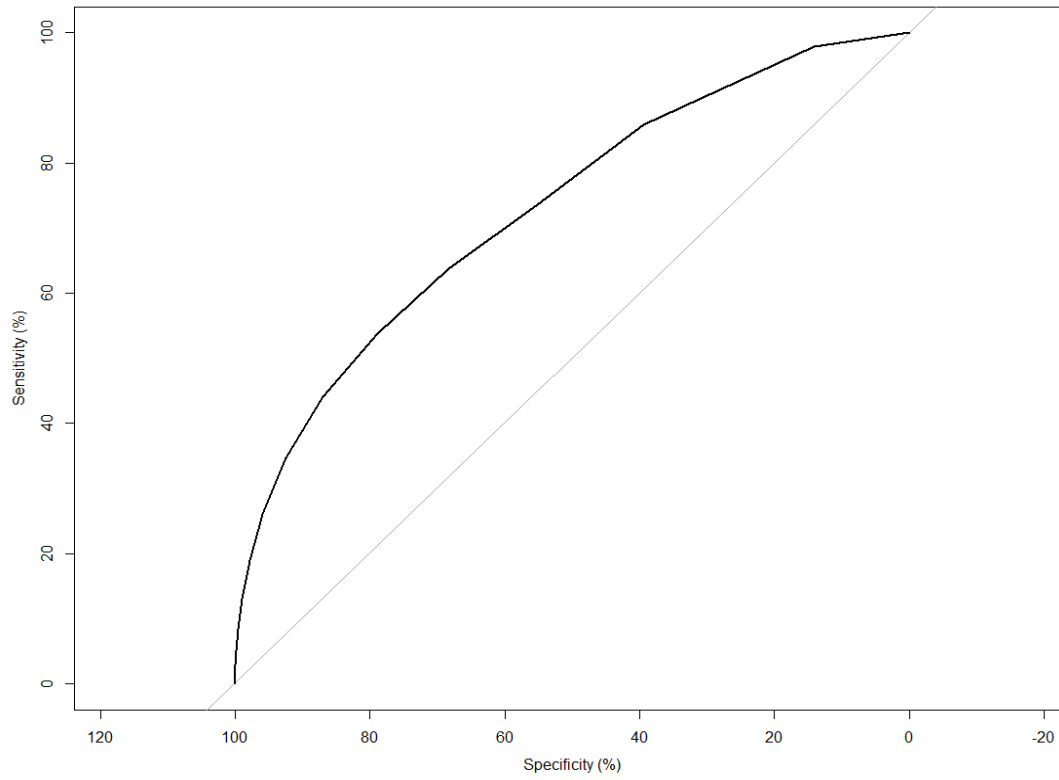

**Supplementary Figure 3.** Kaplan–Meier curve of all-cause mortality.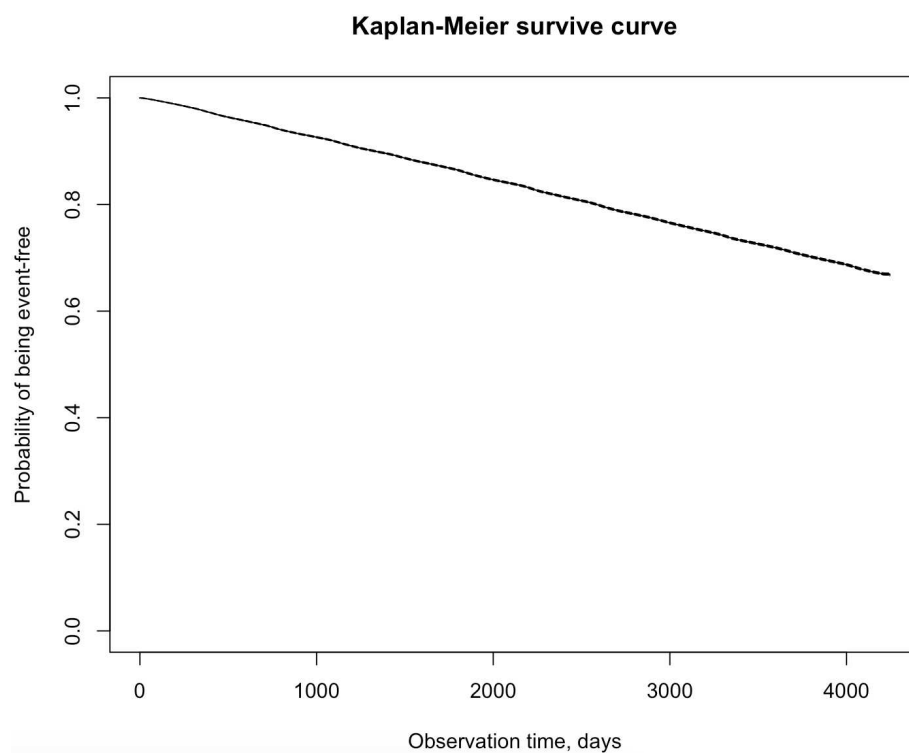**Supplementary Figure 4.** Survival curve generated by multivariate Cox regression.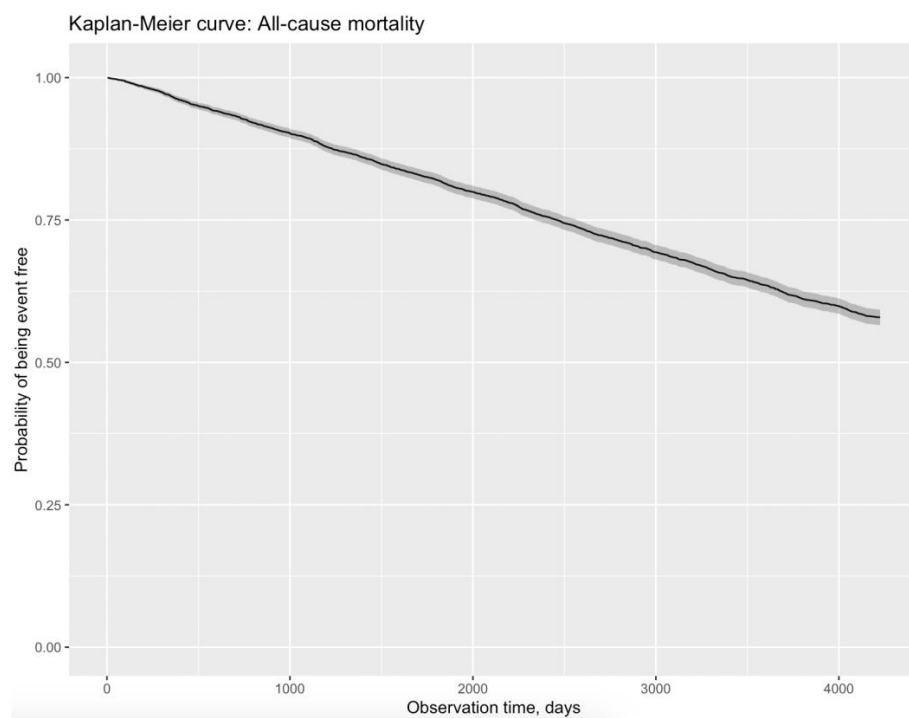



**Supplementary Figure 5.** Selecting optimal tree number for RSF model.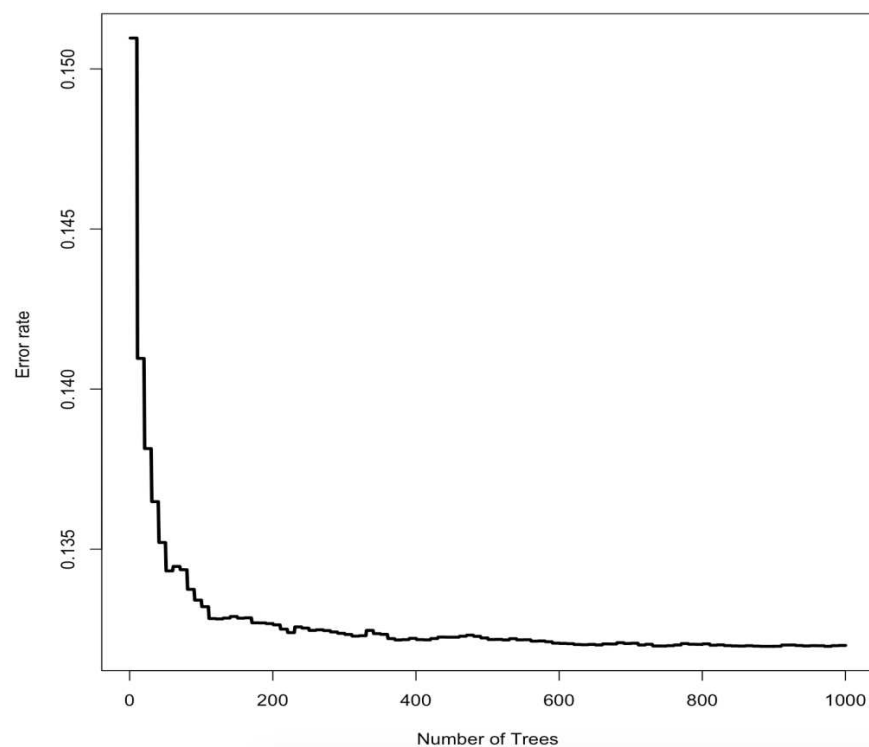**Supplementary Figure 6.** Predicted OOB survivals and the cumulative hazard with RSF model.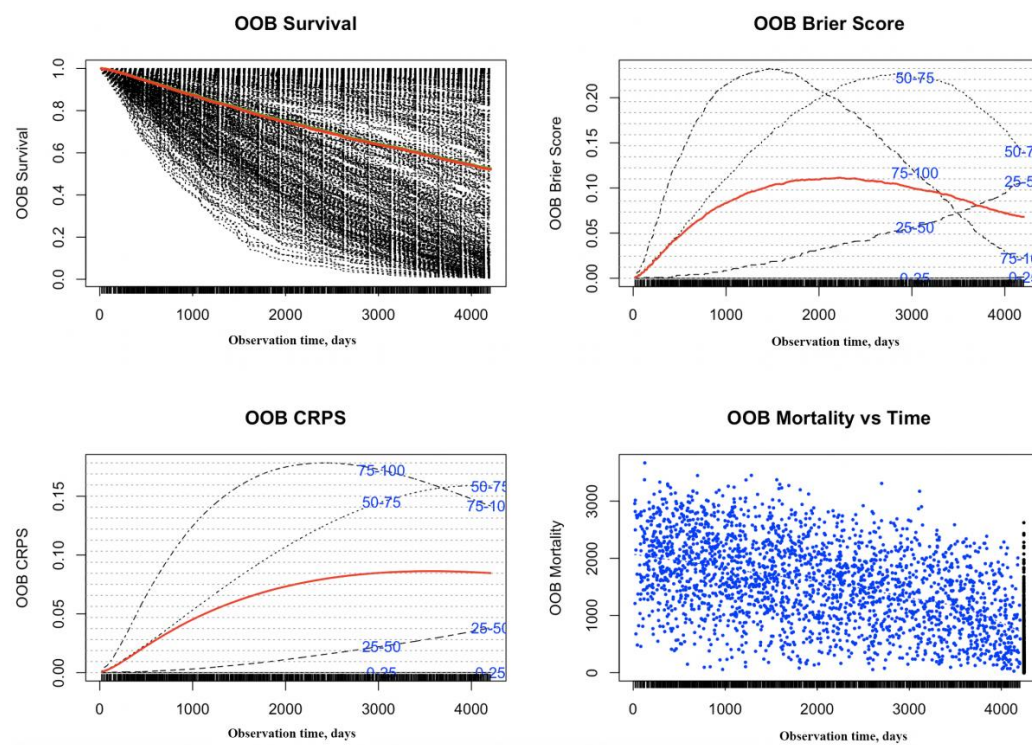

**Supplementary Figure 7.** Predicted OOB survivals and the cumulative hazard with RSF model.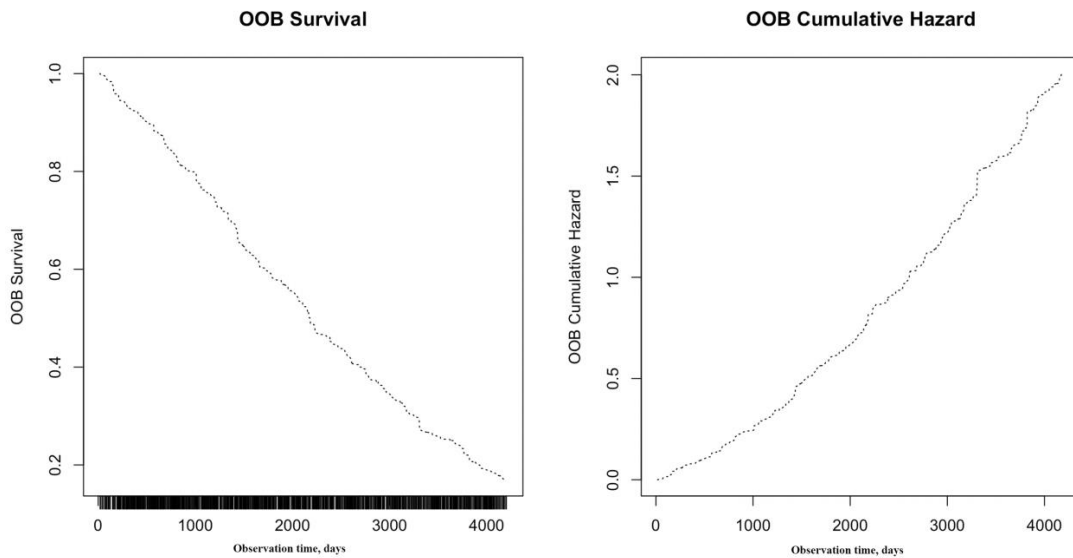**Supplementary Figure 8.** RSF model's reproducibility by comparing one-fold 'test' predicted survivals.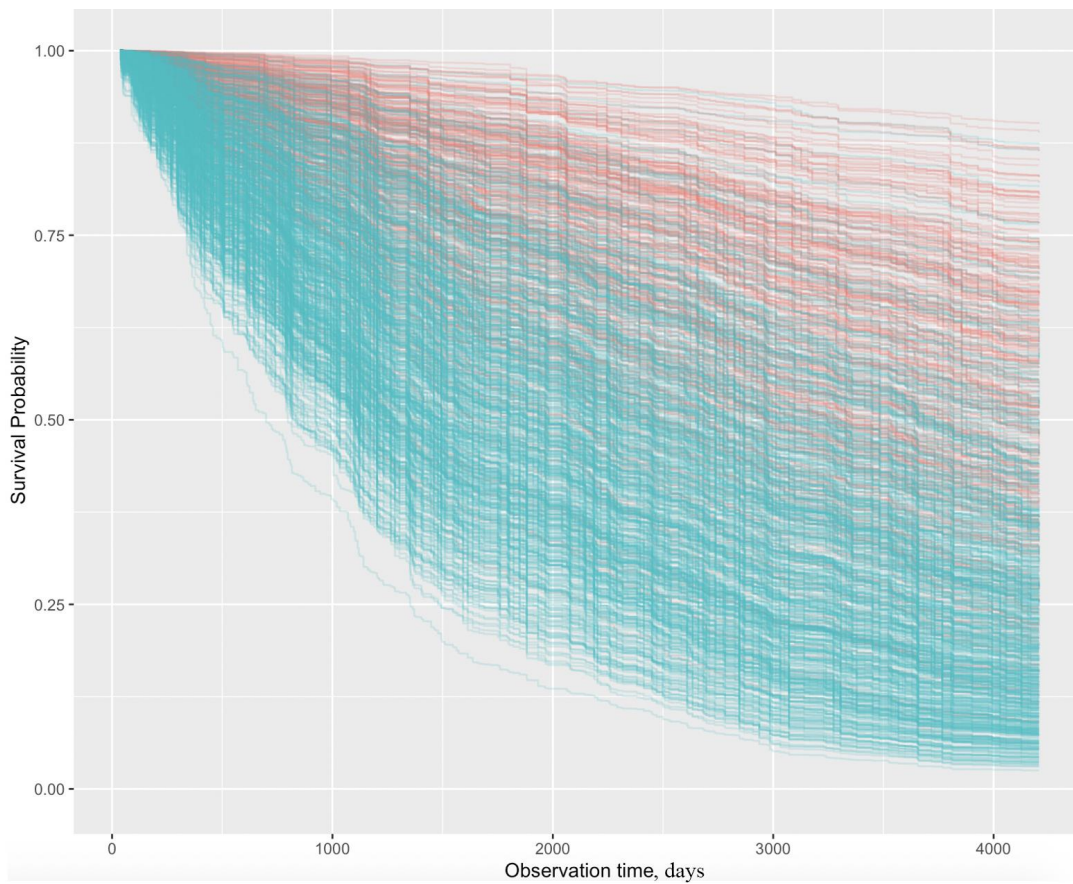

Supplement: bmjdrc-2020-001950supp001_data_supplement.pdf [file bmjdrc-2020-001950supp001_data_supplement.pdf]
